# Supplementary material
Source: publisher figshare collection journal article supplement (https://acs.figshare.com/ndownloader/files/11354219)
Supplement: Supplementary file 1 [file 11354219]

compound	SMILES	IC50 Meprin beta [nM]	SD
6a	COc1ccc(cc1)CN(CC(=O)NO)Cc1cccc(c1)C(=O)O	77	10
6b	COc1ccc(cc1)CN(CCC(=O)NO)Cc1cccc(c1)C(=O)O	643	30
6c	COc1ccc(cc1)CN(CCCC(=O)NO)Cc1cccc(c1)C(=O)O	742	42
6d	COc1cccc(c1)CN(CC(=O)NO)Cc1cccc(c1)C(=O)O	559	32
6e	ONC(=O)CN(Cc1ccc2c(c1)OCO2)Cc1cccc(c1)C(=O)O	285	94
6f	CCCOc1ccc(cc1)CN(CC(=O)NO)Cc1cccc(c1)C(=O)O	2250	982
6g	COc1ccc(cc1F)CN(CC(=O)NO)Cc1cccc(c1)C(=O)O	375	32
6h	COc1cc(c(c(c1)F)CN(CC(=O)NO)Cc1cccc(c1)C(=O)O)F	347	35
6i	ONC(=O)CN(Cc1ccccc1)Cc1cccc(c1)C(=O)O	1285	15
6j	Cc1ccc(cc1)CN(CC(=O)NO)Cc1cccc(c1)C(=O)O	386	23
6k	ONC(=O)CN(Cc1ccc(cc1)Cl)Cc1cccc(c1)C(=O)O	76	4
6l	ONC(=O)CN(Cc1ccc(cc1)F)Cc1cccc(c1)C(=O)O	177	8
6m	ONC(=O)CN(Cc1ccc(cc1)C#N)Cc1cccc(c1)C(=O)O	320	7
6n	ONC(=O)CN(Cc1ccc(cc1)-c1ccccc1)Cc1cccc(c1)C(=O)O	1280	529
6o	ONC(=O)CN(Cc1ccc(cc1)C(=O)O)Cc1cccc(c1)C(=O)O	207	24
7a	ONC(=O)CNCc1cccc(c1)C(=O)O	377	14
7b	C[C@H](NCc1cccc(c1)C(=O)O)C(=O)NO	4200	495
7c	C[C@@H](NCc1cccc(c1)C(=O)O)C(=O)NO	4255	163
7d	CC(C)[C@H](NCc1cccc(c1)C(=O)O)C(=O)NO	15800	2687
7e	CC(C)[C@@H](NCc1cccc(c1)C(=O)O)C(=O)NO	11850	212
7f	ONC(=O)[C@H](Cc1ccccc1)NCc1cccc(c1)C(=O)O	15500	990
7g	ONC(=O)[C@@H](Cc1ccccc1)NCc1cccc(c1)C(=O)O	2910	141
7h	ONC([C@H](c1ccccc1)NCc2cc(C(O)=O)ccc2)=O	12150	71
7i	ONC([C@@H](c1ccccc1)NCc2cc(C(O)=O)ccc2)=O	11650	354
7j	ONC(=O)[C@H](CC(=O)O)NCc1cccc(c1)C(=O)O	1325	92
7k	ONC(=O)[C@@H](CC(=O)O)NCc1cccc(c1)C(=O)O	548	25
7l	ONC(=O)[C@H](CCC(=O)O)NCc1cccc(c1)C(=O)O	654	11
7m	ONC(=O)[C@@H](CCC(=O)O)NCc1cccc(c1)C(=O)O	768	40
8a	ONC(=O)CN(Cc1cccc(c1)C(=O)O)Cc1cccc(c1)C(=O)O	49	11
8b	ONC(=O)CN(Cc1ccc(cc1)C(=O)O)Cc1ccc(cc1)C(=O)O	524	36
8c	CCOC(=O)c1cccc(c1)CN(CC(=O)NO)Cc1cccc(c1)C(=O)OCC	94850	10112
8d	NC(=O)c1cccc(c1)CN(CC(=O)NO)Cc1cccc(c1)C(=O)N	13100	849
8e	ONC(=O)CN(Cc1cccc(c1)C#N)Cc1cccc(c1)C#N	12000	566
8f	ONC(=O)CN(Cc1ccc2c(c1)OCO2)Cc1ccc2c(c1)OCO2	6539	1216
8g	ONC(=O)CN(Cc1cc(c(c(c1)F)O)F)Cc1cc(c(c(c1)F)O)F	272	20
8h	ONC(=O)CN(Cc1ccc(c(c1F)O)F)Cc1ccc(c(c1F)O)F	23	1
8i	ONC(=O)CN(Cc1ccc(c(c1F)O)Cl)Cc1ccc(c(c1F)O)Cl	24	1
8j	ONC(=O)CN(Cc1c(ccc(c1F)O)F)Cc1c(ccc(c1F)O)F	5515	78
8k	ONC(=O)CN(Cc1ccc(c(c1)O)F)Cc1ccc(c(c1)O)F	1060	57
8l	ONC(=O)CN(Cc1cccc(c1F)O)Cc1cccc(c1F)O	2905	7
8m	COc1c(ccc(c1F)CN(CC(=O)NO)Cc1ccc(c(c1F)OC)F)F	18200	849
8n	COc1c(c(ccc1Cl)CN(CC(=O)NO)Cc1ccc(c(c1F)OC)Cl)F	12800	700
8o	ONC(=O)CN(Cc1cccc(c1)OC(F)F)Cc1cccc(c1)OC(F)F	56950	2899
